# Supplementary material for: Cellulose Fibre Degradation in Cellulose/Steel Hybrid Geotextiles under Outdoor Weathering Conditions
Source: MDPI journal article supplement (doi:10.3390/polym14194179), 2022-10-05
Supplement: s1 [file s1]

Cellulose fibre degradation in cellulose/steel hybrid geotextiles under outdoor weathering conditions

| P | 30.08.<br>1st Y                                                                   | 06.09.<br>1st Y                                                                   | 09.09.<br>1st Y                                                                   | 17.09.<br>1st Y                                                                   | 24.09.<br>1st Y                                                                   | 23.10.<br>1st Y                                                                   | 05.11.<br>1st Y                                                                   | 11.11.<br>1st Y                                                                   | 22.11.<br>1st Y                                                                     | 12.12.<br>1st Y                                                                     | 20.12.<br>1st Y                                                                     | 23.01.<br>2nd Y                                                                     | 06.02.<br>2nd Y                                                                     | 13.03.<br>2nd Y                                                                     | 14.04.<br>2nd Y                                                                     | 04.06.<br>2nd Y                                                                     | 21.09.<br>2nd Y                                                                     | 30.10.<br>2nd Y                                                                     |
|---|-----------------------------------------------------------------------------------|-----------------------------------------------------------------------------------|-----------------------------------------------------------------------------------|-----------------------------------------------------------------------------------|-----------------------------------------------------------------------------------|-----------------------------------------------------------------------------------|-----------------------------------------------------------------------------------|-----------------------------------------------------------------------------------|-------------------------------------------------------------------------------------|-------------------------------------------------------------------------------------|-------------------------------------------------------------------------------------|-------------------------------------------------------------------------------------|-------------------------------------------------------------------------------------|-------------------------------------------------------------------------------------|-------------------------------------------------------------------------------------|-------------------------------------------------------------------------------------|-------------------------------------------------------------------------------------|-------------------------------------------------------------------------------------|
| 1 |  |  |  |  |  |  |  |  |  |  |  |  |  |  |  |  |  |  |
| 2 |  |  |  |  |  |  |  |  |  |  |  |  |  |  |  |  |  |  |
| 3 |  |  |  |  |  |  |  |  |  |  |  |  |  |  |  |  |  |  |
| 4 |  |  |  |  |  |  |  |  |  |  |  |  |  |  |  |  |  |  |
| 5 |  |  |  |  |  |  |  |  |  |  |  |  |  |  |  |  |  |  |
| 6 |  |  |  |  |  |  |  |  |  |  |  |  |  |  |  |  |  |  |

Figure S1. Photodocumentation of the biodegradation of the test prototypes P1 – P6 as function of test time.
